# Supplementary material for: Prevalence and Characteristics by Age and Sex in Pediatric Trigger Digits: Nationwide Analysis Using Korea Health Insurance Dataset
Source: PubMed Central journal article supplement — Clin Orthop Surg. 2024 Jun 26;16(4):650–60. doi: 10.4055/cios23413 (PMC11262943; doi:10.4055/cios23413), 2024-06-26
Supplement: cios-16-650-s001.pdf [file cios-16-650-s001.pdf]

**Supplementary Table 1.** ICD Codes and NHIS Prescription Codes for Pediatric TF

| ICD-10 codes for diagnosis of pediatric trigger finger |                                                 |
|--------------------------------------------------------|-------------------------------------------------|
| M6530                                                  | Trigger finger, multiple sites                  |
| M6534                                                  | Trigger finger, unilateral / bilateral          |
|                                                        | Trigger finger, hand / fingers                  |
| M6539                                                  | Trigger finger, other                           |
| NHIS prescription codes of operation for pediatric TF  |                                                 |
| 8735700                                                | Simple reconstruction of tendon & ligament      |
| 8735100                                                | Operation for trigger finger, A1 pulley release |
| 8632900                                                | A1 pulley release of trigger thumb              |
| 8633000                                                | A1 pulley release of trigger finger             |

ICD-10: International Classification of Diseases, 10th Revision, NHIS: National Health Insurance Service, TF: trigger finger.
